# Supplementary material for: Ovarian Morphology in Non-Hirsute, Normo-Androgenic, Eumenorrheic Premenopausal Women from a Multi-Ethnic Unselected Siberian Population
Source: MDPI journal article supplement (doi:10.3390/diagnostics14070673), 2024-03-22
Supplement: s1 [file s1]

**Table S1.** Characteristics of healthy women included to the study population.

| Parameter                                        | Total<br>n= 408                              | Caucasians<br>n=285                          | Asians<br>n=123                                 | p-value                             |
|--------------------------------------------------|----------------------------------------------|----------------------------------------------|-------------------------------------------------|-------------------------------------|
| Mean $\pm$ SD                                    |                                              |                                              |                                                 |                                     |
| Median (Lower Q; Upper Q)                        |                                              |                                              |                                                 |                                     |
| Age, years                                       | 34.32 $\pm$ 5.96<br>35.00 (30.00;39.00)      | 34.04 $\pm$ 6.01<br>34.00 (30.00;39.00)      | 34.98 $\pm$ 5.81<br>35.00 (31.00;40.00)         | $p_u=0.680$                         |
| Anthropometry and vital signs                    |                                              |                                              |                                                 |                                     |
| Mean $\pm$ SD                                    |                                              |                                              |                                                 |                                     |
| Median (Lower Q; Upper Q)                        |                                              |                                              |                                                 |                                     |
| WC, cm                                           | 74.14 $\pm$ 8.85<br>73.00 (67.00;80.00)      | 73.86 $\pm$ 8.95<br>73.00 (67.00;80.00)      | 74.80 $\pm$ 8.63<br>74.00 (68.00;81.00)         | $p_u=0.649$                         |
| BMI, kg/m <sup>2</sup>                           | 23.79 $\pm$ 3.30<br>23.70 (21.15;26.60)      | 23.90 $\pm$ 3.29<br>23.90 (21.20;26.70)      | 23.54 $\pm$ 3.31<br>23.70 (20.90;26.30)         | $p_u=0.916$                         |
| Systolic blood pressure,<br>mm Hg                | 119.51 $\pm$ 11.52<br>119.00 (112.00;126.00) | 119.40 $\pm$ 11.02<br>120.00 (112.00;125.00) | 119.75 $\pm$ 12.64<br>117.00<br>(111.00;126.00) | $p_u=0.066$                         |
| Diastolic blood pressure,<br>mm Hg               | 76.51 $\pm$ 8.61<br>76.00 (70.00;81.500)     | 76.00 $\pm$ 8.39<br>76.00 (70.00;81.00)      | 77.71 $\pm$ 9.05<br>77.00 (71.00;83.00)         | $p_u=0.307$                         |
| Education n/N (%)                                |                                              |                                              |                                                 | <b><math>p_{KW}&lt;0.001</math></b> |
| Doctoral degree                                  | 27/408 (6.62%)                               | 15/285 (5.26%)                               | 12/123 (9.76%)                                  | $p_z=0.093$                         |
| Master's degree                                  | 286/408 (70.10%)                             | 185/285 (64.91%)                             | 101/123<br>(82.11 %)                            | <b><math>p_z=0.001</math></b>       |
| Incomplete high school                           | 16/408 (3.92%)                               | 13/285 (4.56%)                               | 3/123 (2.44%)                                   | $p_z=0.311$                         |
| Bachelor's degree                                | 58/408 (14.22%)                              | 52/285 (18.25%)                              | 6/123 (4.88%)                                   | <b><math>p_z&lt;0.001</math></b>    |
| Some college                                     | 1/408 (0.25%)                                | 1/285 (0.35%)                                | 0/123 (0.00%)                                   | $p_z=0.511$                         |
| High school or<br>equivalent                     | 14/408 (3.43%)                               | 13/285 (4.56%)                               | 1/123 (0.81%)                                   | $p_z=0.056$                         |
| Middle school only                               | 5/408 (1.23%)                                | 5/285 (1.75%)                                | 0/123 (0.00%)                                   | $p_z=0.140$                         |
| Elementary school                                | 0/408 (0.00%)                                | 0/285 (0.00%)                                | 0/123 (0.00%)                                   | NA                                  |
| No degree                                        | 1/408 (0.25%)                                | 1/285 (0.35%)                                | 0/123 (0.00%)                                   | $p_z=0.511$                         |
| Occupation, n/N (%)                              |                                              |                                              |                                                 | <b><math>p_{KW}&lt;0.001</math></b> |
| Legislators. senior<br>officials and managers    | 9/408 (2.22%)                                | 8/285 (2.83%)                                | 1/123 (0.82%)                                   | $p_z=0.511$                         |
| Professionals                                    | 179/408 (44.20%)                             | 108/285 (38.16%)                             | 71/123 (58.20%)                                 | $p_z=0.206$                         |
| Technicians and<br>associate professionals       | 78/408 (19.26%)                              | 62/285 (21.91%)                              | 16/123 (13.11%)                                 | <b><math>p_z&lt;0.001</math></b>    |
| Office clerks                                    | 55/408 (13.58%)                              | 33/285 (11.66%)                              | 22/123 (18.03%)                                 | <b><math>p_z=0.039</math></b>       |
| Service workers and<br>shop and market sales     | 21/408 (5.19%)                               | 13/285 (4.59%)                               | 8/123 (6.56%)                                   | $p_z=0.084$                         |
| Skilled agricultural and<br>fishery workers      | 1/408 (0.25%)                                | 1/285 (0.35%)                                | 0/123 (0.00%)                                   | $p_z=0.511$                         |
| Craft and related trades<br>workers              | 41/408 (10.12%)                              | 38/285 (13.43%)                              | 3/123 (2.46%)                                   | <b><math>p_z=0.001</math></b>       |
| Plant and machine<br>operators and<br>assemblers | 8/408 (1.98%)                                | 8/285 (2.83%)                                | 0/123 (0.00%)                                   | $p_z=0.059$                         |
| Elementary occupations                           | 13/408 (3.21%)                               | 12/285 (4.24%)                               | 1/123 (0.82%)                                   | $p_z=0.072$                         |
| Marital status n/N (%)                           |                                              |                                              |                                                 | $p_{KW}=0.890$                      |
| Single                                           | 97/408 (23.89%)                              | 68/285 (23.86%)                              | 29/123 (23.97%)                                 |                                     |
| Married                                          | 220/408 (54.19%)                             | 152/285 (53.33%)                             | 68/123 (56.20%)                                 |                                     |
| Living with another                              | 38/408 (9.36%)                               | 30/285 (10.53%)                              | 8/123 (6.61%)                                   |                                     |
| Separated                                        | 5/408 (1.23%)                                | 4/285 (1.40%)                                | 1/123 (0.83%)                                   |                                     |
| Divorced                                         | 35/408 (8.62%)                               | 23/285 (8.07%)                               | 12/123 (9.92%)                                  |                                     |
| Widowed                                          | 8/408 (1.97%)                                | 6/285 (2.11%)                                | 2/123 (1.65%)                                   |                                     |
| Would rather not say                             | 3/408 (0.74%)                                | 2/285 (0.70%)                                | 1/123 (0.83%)                                   |                                     |

| Menstrual and reproductive history   |                                               |                                               |                                                  |                                  |
|--------------------------------------|-----------------------------------------------|-----------------------------------------------|--------------------------------------------------|----------------------------------|
|                                      | Mean $\pm$ SD                                 |                                               |                                                  |                                  |
|                                      | Median (Lower Q; Upper Q)                     |                                               |                                                  |                                  |
| Age at menarche, years               | 13.28 $\pm$ 1.35<br>13.00 (12.00;14.00)       | 13.22 $\pm$ 1.31<br>13.00 (12.00;14.0)        | 13.41 $\pm$ 1.43<br>13.00 (12.00;14.00)          | $p_u=0.223$                      |
| Average menstrual cycle length, days | 27.71 $\pm$ 2.11<br>28.00 (27.99;29.00)       | 27.61 $\pm$ 2.16<br>28.00 (27.00;28.00)       | 27.93 $\pm$ 1.97<br>28.00 (27.00;30.00)          | $p_u=0.251$                      |
| Parity of pregnancies                | 2.36 $\pm$ 2.15<br>2.00 (1.00;3.00)           | 2.37 $\pm$ 2.19<br>2.00 (1.00;4.00)           | 2.33 $\pm$ 2.04<br>2.00 (1.00;3.00)              | $p_u=0.375$                      |
| mFG score                            | 0.54 $\pm$ 0.96<br>0.00 (0.00;1.00)           | 0.62 $\pm$ 1.02<br>0.00 (0.00;1.00)           | 0.37 $\pm$ 0.78<br>0.00 (0.00;0.00)              | <b><math>p_u=0.001</math></b>    |
| Hormones                             |                                               |                                               |                                                  |                                  |
|                                      | Mean $\pm$ SD                                 |                                               |                                                  |                                  |
|                                      | Median (Lower Q; Upper Q)                     |                                               |                                                  |                                  |
| Prolactin, mIU/ml                    | 333.91 $\pm$ 153.57<br>307.00 (218.00;438.50) | 303.38 $\pm$ 134.08<br>277.00 (202.00;382.00) | 404.64 $\pm$ 172.07<br>399.00<br>(269.00;509.00) | <b><math>p_u=0.001</math></b>    |
| TSH, mIU/ml                          | 1.56 $\pm$ 0.73<br>1.50 (1.00;2.00)           | 1.52 $\pm$ 0.73<br>1.40 (1.00;1.90)           | 1.66 $\pm$ 0.72<br>1.60 (1.20;2.10)              | $p_u=0.996$                      |
| LH, mIU/ml                           | 7.23 $\pm$ 10.02<br>5.30 (3.20;7.50)          | 7.52 $\pm$ 10.16<br>5.60 (3.30;7.90)          | 6.57 $\pm$ 9.67<br>4.80 (3.20;7.00)              | $p_u=0.533$                      |
| FSH, mIU/ml                          | 5.86 $\pm$ 3.22<br>5.40 (3.8;7.0)             | 5.96 $\pm$ 3.22<br>5.50 (4.00;7.00)           | 5.67 $\pm$ 3.22<br>5.10 (3.60;6.90)              | $p_u=1.00$                       |
| TT, ng/dl                            | 25.02 $\pm$ 13.74<br>24.69<br>(14.93;33.61)   | 26.22 $\pm$ 14.68<br>25.70<br>(16.05;34.83)   | 21.78 $\pm$ 10.65<br>22.09<br>(13.64;29.99)      | <b><math>p_u&lt;0.001</math></b> |
| SHBG, nmol/l                         | 86.23 $\pm$ 56.21<br>70.35 (47.00;105.70)     | 90.48 $\pm$ 59.98<br>71.00 (51.40;115.00)     | 76.38 $\pm$ 45.00<br>65.60 (43.50;96.80)         | <b><math>p_u&lt;0.001</math></b> |
| FAI                                  | 1.35 $\pm$ 1.05<br>1.15 (0.59;1.83)           | 1.42 $\pm$ 1.17<br>1.19 (0.59;1.88)           | 1.19 $\pm$ 0.70<br>1.07 (0.57;1.62)              | <b><math>p_u&lt;0.001</math></b> |
| DHEAS, $\mu$ g/dl                    | 160.52 $\pm$ 65.36<br>155.00 (113.00;202.00)  | 164.65 $\pm$ 68.89<br>158.00 (118.00;210.00)  | 150.87 $\pm$ 55.32<br>145.00<br>(106.00;187.00)  | <b><math>p_u=0.006</math></b>    |
| 17OHP, nmol/l                        | 5.50 $\pm$ 3.37<br>5.15 (2.50;7.00)           | 5.63 $\pm$ 3.35<br>5.40 (2.80;7.00)           | 5.21 $\pm$ 3.41<br>5.00 (2.10;7.00)              | $p_u=0.810$                      |
| AMH, ng/ml                           | 2.85 $\pm$ 2.21<br>2.20 (1.10;4.40)           | 2.91 $\pm$ 2.20<br>2.30 (1.10;4.50)           | 2.71 $\pm$ 2.22<br>1.90 (0.57;1.62)              | $p_u=0.900$                      |

Abbreviations: WC is waist circumference, BMI is body mass index, mFG score is modified Ferriman-Gallwey score, NA- not applicable;  $u$ ,  $z$ ,  $k_w$  – U-test; Z test; Kruskal-Wallis ANOVA test, respectively
